# Supplementary material for: Effect of Calcium Chloride as a Coagulant on the Properties of ESBR/Silica Wet Masterbatch Compound
Source: MDPI journal article supplement (doi:10.3390/polym10101116), 2018-10-09
Supplement: s1 [file s1]

## Supporting Information

### Effects of Calcium Chloride as a Coagulant on the Properties of ESBR/silica Wet Masterbatch Compound

Woong Kim <sup>1</sup>, Byungkyu Ahn <sup>1</sup>, Hyunsung Mun <sup>1</sup>, Eunho Yu <sup>1</sup>, Kiwon Hwang <sup>1</sup>, Donghyuk Kim <sup>1</sup>, Gyeongchan Ryu <sup>1</sup>, and Wonho Kim <sup>1,\*</sup>

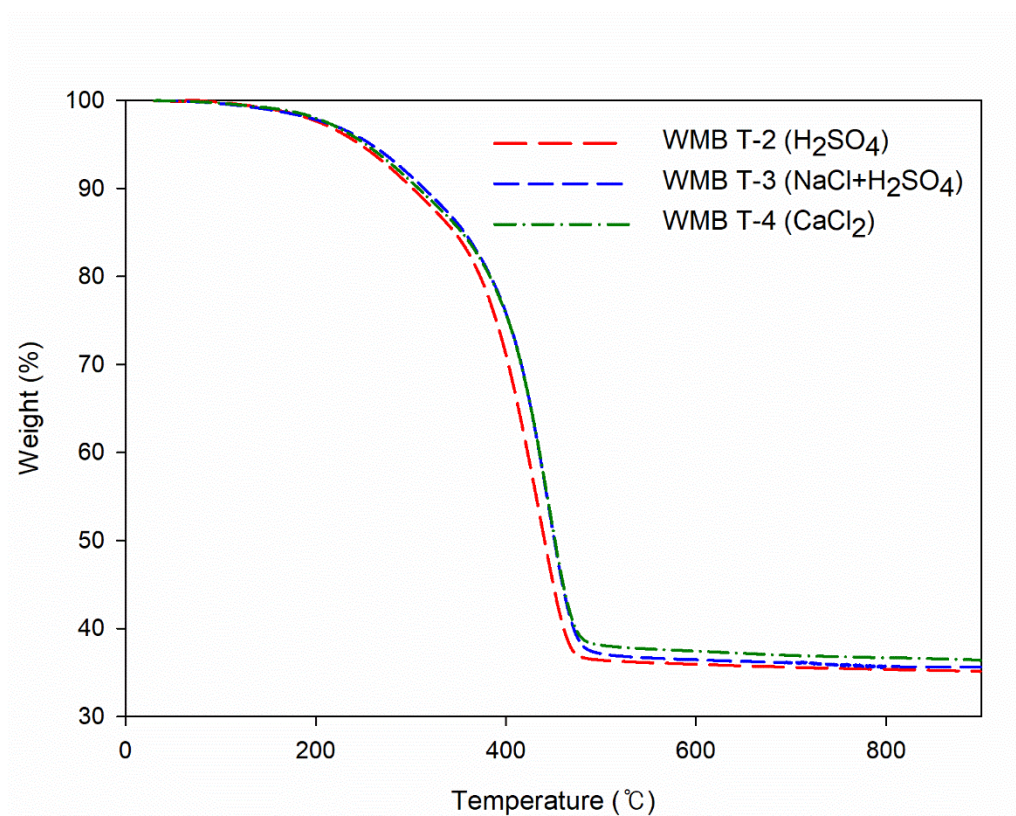

**Fig. S1.** TGA thermogram for the silica content in the WMBs depending on the coagulant type. In each graph, it is possible to confirm that TDAE oil, ESBR and TESPT are burned as the temperature rises, and the silica content in WMB can be estimated through the content of the remaining ash: Red line is a thermogram of WMB T-2 used H<sub>2</sub>SO<sub>4</sub> coagulant, blue line is a thermogram of WMB T-3 used NaCl+H<sub>2</sub>SO<sub>4</sub>, and green line is a thermogram of WMB T-4 used CaCl<sub>2</sub>.
